# Supplementary material for: Non-extractable PFAS in functional textiles – characterization by complementary methods: oxidation, hydrolysis, and fluorine sum parameters
Source: Royal Society of Chemistry journal article supplement (doi:10.1039/d3em00131h), 2023-01-01
Supplement: d3em00131h1.pdf [file d3em00131h1.pdf]

## Supporting Information

# Non-extractable PFAS in functional textiles – Characterization by complementary methods: oxidation, hydrolysis, and fluorine sum parameters

Jonathan Zweigle,<sup>+</sup> Catharina Capitain,<sup>+</sup> Fabian Simon,<sup>||</sup> Philipp Roesch,<sup>‡</sup> Boris Bugsel,  
<sup>+</sup> Christian Zwiener<sup>+,\*</sup>

<sup>+</sup>Environmental Analytical Chemistry, Department of Geosciences, University of Tübingen, Schnarrenbergstraße  
94-96, 72076 Tübingen, Germany

<sup>||</sup>Federal Institute for Materials Research and Testing (BAM), Division 1.1 – Inorganic Trace Analysis, Richard-  
Willstätter-Straße 11, 12489 Berlin, Germany

<sup>‡</sup>Federal Institute for Materials Research and Testing (BAM), Division 4.3 - Contaminant Transfer and  
Environmental Technologies, Unter den Eichen 87, 12205, Berlin, Germany

<sup>\*</sup>Corresponding author

## Contents

|    |                                                                                                                                                                                                                                                                                        |   |
|----|----------------------------------------------------------------------------------------------------------------------------------------------------------------------------------------------------------------------------------------------------------------------------------------|---|
| S1 | CHEMICALS AND REAGENTS .....                                                                                                                                                                                                                                                           | 2 |
| S2 | INSTRUMENTAL ANALYSIS .....                                                                                                                                                                                                                                                            | 2 |
|    | Table S 1: Gradient elution used for HPLC-QTOF-MS and HPLC-QqQ-MS measurements. ....                                                                                                                                                                                                   | 2 |
|    | Table S 2: Instrument and ESI source parameters used during HPLC-QqQ-MS/MS measurements. ....                                                                                                                                                                                          | 2 |
|    | Table S 3: Summary of APCI and QTOF parameters .....                                                                                                                                                                                                                                   | 3 |
|    | Table S 4: MRM parameters for PFCAs measured by HPLC-QqQ-MS. ....                                                                                                                                                                                                                      | 3 |
|    | Non-target screening by HPLC-QTOF-MS and GC-QTOF-MS. ....                                                                                                                                                                                                                              | 4 |
|    | TF measurements by combustion ion chromatography .....                                                                                                                                                                                                                                 | 4 |
|    | Conversion of fluorine from PFCAs and FTOHs to mass fluorine .....                                                                                                                                                                                                                     | 5 |
|    | Table S 5: Combustion parameters used for TF measurements. ....                                                                                                                                                                                                                        | 6 |
|    | Table S 6: Ion chromatography parameters. ....                                                                                                                                                                                                                                         | 6 |
|    | Table S 7: TF boat program. ....                                                                                                                                                                                                                                                       | 6 |
|    | Table S 8: IC eluent gradient program. ....                                                                                                                                                                                                                                            | 6 |
| S3 | SUPPORTING FIGURES .....                                                                                                                                                                                                                                                               | 7 |
|    | Figure S 1: Examples of photos taken of water and sunflower oil droplets on textile surfaces to determine the contact<br>angle. ....                                                                                                                                                   | 7 |
|    | Extraction recovery test .....                                                                                                                                                                                                                                                         | 7 |
|    | Figure S 2: Extraction recoveries for PFHpA, PFOA, and PFOS from spike experiments with two textiles. ....                                                                                                                                                                             | 7 |
|    | Figure S 3: Concentration of ΣPFCAs after 5 h PhotoTOP oxidation in different textiles vs. water and sunflower oil<br>contact angles. Three textiles were completely oil wetting and no PFCAs formed after PhotoTOP oxidation. Water<br>repellency was observed for all textiles. .... | 8 |
|    | Figure S 4: Correlation of partially semi-quantified ΣFTOHs after the THP assay vs. TF and EOF. ....                                                                                                                                                                                   | 8 |
|    | Figure S 5: Normalized peak areas of main PFCAs formed from PhotoTOP oxidation of textile T05 and T15 over a<br>time of 10 h. ....                                                                                                                                                     | 8 |
|    | Figure S 6: Concentration of PFCAs after 3 and 6 h of dTOP oxidation in textile T05 and T15 respectively. ....                                                                                                                                                                         | 9 |
|    | REFERENCES .....                                                                                                                                                                                                                                                                       | 9 |

## S1 Chemicals and reagents

LC/MS grade water, methanol (MeOH), ammonium acetate (NH<sub>4</sub>Ac), and formic acid (FA) were purchased from Thermo Fisher Scientific, as well as hydrochloric acid (32%). Sodium hydroxide (NaOH), tert-butyl methyl ether (MTBE, ≥ 99.5%), and Titanium(IV)dioxide (TiO<sub>2</sub> anatase, powder, 99.8% trace metal basis) were ordered from Sigma-Aldrich. Hydrogen peroxide solution (H<sub>2</sub>O<sub>2</sub>, ≥ 30%) was purchased from Fluka Analytical. Potassium persulfate (≥ 99%) and ammonium hydroxide solution (25% NH<sub>4</sub>OH) originated from Acros Organics. Anhydrous Na<sub>2</sub>SO<sub>4</sub> and n-hexane for gas chromatography were purchased from Merck. PFCA reference standards (PFBA, PFPeA, PFHxA, PFHpA, PFOA, PFNA, PFDA, PFUnDA, PFDoDA, PFTrDA, PFTeDA, PFHxDA, and PFODA) and, a mass-labelled PFAS extraction standard solution (MPFAC-C-ES) were ordered from Wellington Laboratories.

## S2 Instrumental analysis

**Table S 1:** Gradient elution used for HPLC-QTOF-MS and HPLC-QqQ-MS measurements. Eluent A: 95/5 water/MeOH + 2 mM NH<sub>4</sub>Ac, eluent B: 5/95 water/MeOH + 2mM NH<sub>4</sub>Ac.

| 6550 QTOF-MS |       |       | 6490 QqQ-MS |       |       |
|--------------|-------|-------|-------------|-------|-------|
| Time (min)   | A (%) | B (%) | Time (min)  | A (%) | B (%) |
| 0.0          | 85    | 15    | 0.0         | 60    | 40    |
| 2.0          | 30    | 70    | 1.0         | 40    | 60    |
| 5.0          | 10    | 90    | 3.5         | 0     | 100   |
| 10.0         | 0     | 100   | 6.0         | 0     | 100   |
| 15.0         | 0     | 100   | 6.1         | 60    | 40    |
| 15.1         | 85    | 15    | 8.0         | 60    | 40    |
| 22.0         | 85    | 15    |             |       |       |

56

**Table S 2:** Instrument and ESI source parameters used during HPLC-QqQ-MS/MS measurements.

|                                   | 6490 QqQ | 6550 QTOF |
|-----------------------------------|----------|-----------|
| <b>Instrument parameters</b>      |          |           |
| Gas Temp (°C)                     | 150      | 150       |
| Gas Flow (L/min)                  | 16       | 16        |
| Nebulizer pressure (psig)         | 45       | 35        |
| Sheath gas temperature (°C)       | 380      | 380       |
| Sheath gas flow (L/min)           | 12       | 12        |
| Fragmentor voltage (V)            | 380      | 360       |
| <b>Ion source parameter (ESI)</b> |          |           |
| Capillary voltage (V)             | 3000     | 3000      |
| Nozzle voltage (V)                | 0        | 300       |

58

59 **Table S 3:** Summary of APCI and QTOF parameters used during GC-QTOF-MS measurements.

| APCI/QTOF Parameter    | Value |
|------------------------|-------|
| Gas Temp (°C)          | 270   |
| Drying gas (L/min)     | 11    |
| Fragmentor voltage (V) | 150   |
| Capillary voltage (V)  | 1000  |
| Corona current (μA)    | 1     |

60 **Table S 4:** MRM parameters for PFCAs measured by HPLC-QqQ-MS. Precursor and corresponding product ion  
61 with the respective collision energy (CE).

| Compound                            | Precursor ion | Product ion | CE (eV) | Compound                             | Precursor ion | Product ion | CE (eV) |
|-------------------------------------|---------------|-------------|---------|--------------------------------------|---------------|-------------|---------|
| PFBA                                | 212.9         | 168.8       | 5       | H2PFDA                               | 477           | 393         | 15      |
| <sup>13</sup> C <sub>4</sub> -PFBA  | 217           | 172         | 5       | H4PFUnA                              | 491           | 367         | 25      |
| PFPeA                               | 262.9         | 68.8        | 45      | H4PFUnA                              | 491           | 387         | 15      |
| PFPeA                               | 262.9         | 219         | 5       | PFOSA                                | 498           | 78          | 40      |
| <sup>13</sup> C <sub>5</sub> -PFPeA | 268           | 70          | 45      | L-PFOS                               | 499           | 79.7        | 55      |
| <sup>13</sup> C <sub>5</sub> -PFPeA | 268           | 223         | 5       | L-PFOS                               | 499           | 99          | 50      |
| L-PFBS                              | 298.9         | 79.8        | 40      | <sup>13</sup> C <sub>8</sub> -PFOS   | 507           | 80          | 50      |
| L-PFBS                              | 298.9         | 98.9        | 30      | <sup>13</sup> C <sub>8</sub> -PFOS   | 507           | 99          | 55      |
| <sup>13</sup> C <sub>3</sub> -PFBS  | 302           | 80          | 40      | PFDA                                 | 512.9         | 268.9       | 15      |
| <sup>13</sup> C <sub>3</sub> -PFBS  | 302           | 99          | 30      | PFDA                                 | 512.9         | 468.8       | 10      |
| PFHxA                               | 312.9         | 119         | 25      | <sup>13</sup> C <sub>6</sub> -PFDA   | 519           | 270         | 15      |
| PFHxA                               | 312.9         | 268.9       | 5       | <sup>13</sup> C <sub>6</sub> -PFDA   | 519           | 474         | 15      |
| <sup>13</sup> C <sub>5</sub> -PFHxA | 318           | 120         | 25      | L-PFNS                               | 549           | 80          | 50      |
| <sup>13</sup> C <sub>5</sub> -PFHxA | 318           | 273         | 5       | L-PFNS                               | 549           | 99          | 50      |
| L-PFPeS                             | 349           | 80          | 25      | PFUnA                                | 563           | 519         | 5       |
| L-PFPeS                             | 349           | 99          | 30      | PFUnA                                | 563           | 269         | 15      |
| PFHpA                               | 362.8         | 168.7       | 15      | <sup>13</sup> C <sub>7</sub> -PFUnA  | 570           | 270         | 15      |
| PFHpA                               | 362.8         | 318.8       | 5       | <sup>13</sup> C <sub>7</sub> -PFUnA  | 570           | 525         | 5       |
| <sup>13</sup> C <sub>4</sub> -PFHpA | 367           | 169         | 15      | L-PFDS                               | 599           | 80          | 55      |
| <sup>13</sup> C <sub>4</sub> -PFHpA | 367           | 322         | 5       | L-PFDS                               | 599           | 99          | 55      |
| L-PFHxS                             | 398.8         | 79.9        | 45      | PFDaA                                | 613           | 369         | 15      |
| L-PFHxS                             | 398.8         | 98.9        | 45      | PFDaA                                | 613           | 569         | 10      |
| <sup>13</sup> C <sub>3</sub> -PFHxS | 402           | 80          | 45      | <sup>13</sup> C <sub>2</sub> -PFDaA  | 615           | 369         | 15      |
| <sup>13</sup> C <sub>3</sub> -PFHxS | 402           | 99          | 45      | <sup>13</sup> C <sub>2</sub> -PFDaA  | 615           | 570         | 10      |
| PFOA                                | 412.9         | 168.7       | 20      | PFTTrDA                              | 663           | 169         | 30      |
| PFOA                                | 412.9         | 368.7       | 5       | PFTTrDA                              | 663           | 619         | 10      |
| <sup>13</sup> C <sub>8</sub> -PFOA  | 421           | 172         | 15      | L-PFDoS                              | 699           | 80          | 55      |
| <sup>13</sup> C <sub>8</sub> -PFOA  | 421           | 376         | 5       | L-PFDoS                              | 699           | 99          | 50      |
| H4PFOS                              | 427           | 81          | 40      | PFTeDA                               | 713           | 169         | 25      |
| H4PFOS                              | 427           | 407         | 25      | PFTeDA                               | 713           | 669         | 10      |
| L-PFHpS                             | 449           | 80          | 50      | <sup>13</sup> C <sub>2</sub> -PFTeDA | 715           | 169         | 25      |
| L-PFHpS                             | 449           | 99          | 45      | <sup>13</sup> C <sub>2</sub> -PFTeDA | 715           | 670         | 10      |
| PFNA                                | 462.9         | 218.8       | 15      | PFHxDA                               | 813           | 169         | 45      |
| PFNA                                | 462.9         | 418.8       | 5       | PFHxDA                               | 813           | 769         | 10      |
| <sup>13</sup> C <sub>9</sub> -PFNA  | 472           | 223         | 15      | PFODA                                | 913           | 169         | 40      |
| <sup>13</sup> C <sub>9</sub> -PFNA  | 472           | 427         | 5       | PFODA                                | 913           | 869         | 15      |
| H2PFDA                              | 477           | 63          | 5       |                                      |               |             |         |

## 62 **Non-target screening by HPLC-QTOF-MS and GC-QTOF-MS**

63 Textile extracts and selected PhotoTOP samples were analyzed by HPLC-QTOF-MS (1260  
64 Infinity HPLC system, coupled to a 6550 QTOF mass spectrometer, Agilent Technologies).  
65 A Poroshell 120 EC-C<sub>18</sub> column (2.7 μm, 2.1 × 100 mm) was used at a flow rate of 0.3 mL/min  
66 (40 °C) with a 23 min gradient program (for details see Table S1). The ESI source was operated  
67 in negative mode (details in Table S2). 5 μL sample was injected with a prior threefold needle  
68 wash in isopropanol. Each measurement set included a MeOH and extraction blank. Data  
69 acquisition (3 spectra/s) started after a 1 min waste line in the data-dependent acquisition mode  
70 (ddMS<sup>2</sup>, precursor selection threshold of 1000 counts and 0.5 min exclusion after 3 MS/MS  
71 spectra) with a static exclusion list generated from blank injections. The *m/z* range in MS was  
72 100 – 1700 and 70 – 1700 in MS/MS. MS/MS spectra were acquired by using a linear mass-

73 dependent collision energy of  $CE(m/z) = \frac{3\ m/z}{100} + 15\ \text{eV}$ .

74 For peak finding, the MolecularFeatureExtraction algorithm of the Agilent Qualitative 10.0  
75 Software was used, and Kendrick mass defect analysis was applied to CSV files to find  
76 potential PFAS homologues as previously described.<sup>1</sup> FindPFAS was used to search all  
77 MS/MS for fragment mass differences characteristic to PFAS (e.g., ΔCF<sub>2</sub>, ΔC<sub>2</sub>F<sub>4</sub>, ΔHF).<sup>2</sup>  
78 Furthermore, chromatograms of suspected PFAS were manually extracted to check for their  
79 occurrence. The identical procedure was applied to the GC-QTOF-MS raw data.

## 80 **TF measurements by combustion ion chromatography**

81 For determination of the instrumental LOQ and LOD values, the standard protocol according  
82 to DIN 32645 was followed. Therein, ten repeated measurements of twenty different blank  
83 samples (empty sample boats) were conducted. Subsequently, the standard deviation (SD) was  
84 calculated, divided by the slope of the calibration curve (1-250 μg/L F<sup>-</sup>) and multiplied times  
85 3, resulting in the instrumental LOD value of 3 μg/L. Factor ten was used for the determination

86 of the instrumental LOQ (= 10 µg/L). All measured fluoride values per sample were above the  
87 determined LOQ.

88 The CIC was controlled by the software Chromeleon 7.2.10 (Thermo Fisher Scientific GmbH,  
89 Dreieich, Germany). The combustion unit consisted of an autosampler (ASC-270LS)  
90 connected to the induction furnace (AQF-2100H) operating between 1000 and 1050 °C. Prior  
91 to combustion, all ceramic boats were prebaked for at least 5 min at 1000 °C to avoid organic  
92 contamination. All samples were hydro-pyrolyzed in the horizontal combustion furnace  
93 operating at 1050 °C under a flow of O<sub>2</sub> (300 mL/min), Ar (150 mL/min) using sample specific  
94 boat programs (Table S7). Combustion gases were absorbed in a freshly prepared 3 mM NH<sub>3</sub>  
95 absorption solution, added with an internal standard for monitoring the exact absorption  
96 volume by ion chromatography. For TF measurements, the water supply level was set to “4”  
97 and the medium absorption volume of the GA210 (~16 mL) was selected. A 5 µL aliquot was  
98 injected into the ion chromatography using Dionex IonPac AG20 (2 × 50 mm) as guard column  
99 and Dionex IonPac AS20 (2 × 250mm) as analytic column, both maintained at a constant  
100 column temperature of 30 °C. Chromatographic separation was directed by an automated  
101 KOH eluent generator, controlled by an optimized gradient program (5 mM to 50 mM) at a  
102 constant flow rate of 0.25 mL/min (Table S8). Fluoride ions were sensed by a conductivity  
103 detector using 50 mM H<sub>2</sub>SO<sub>4</sub> as suppressor regenerant. For calculation of detected peak areas  
104 and fluoride concentrations chromatography data system Chromeleon 7.2.10 (Thermo Fisher  
105 Scientific) was used. After combustion of the samples and subsequent quantification of the  
106 fluoride amount by IC, the collected raw data were transferred to an external computer for  
107 more detailed evaluation in Origin 2020 (OriginLab Corporation).

#### 108 **Conversion of fluorine from PFCAs and FTOHs to mass fluorine**

109 To convert PFCAs and FTOHs to mass of fluorine, the measured mass concentration (µg/L)  
110 of each compound (e.g., PFPeA, PFHxA and PFHpA) was converted into moles of substance

per textile mass (e.g.,  $\mu\text{mol/kg}$ ). Then, by using the number of fluorine atoms, the mass of fluorine per mass of textile was calculated (e.g. mg/kg).

**Table S 5:** Combustion parameters used for TF measurements.

| <b>Combustion component</b>           |                                                                      |
|---------------------------------------|----------------------------------------------------------------------|
| Combustion device                     | AQF-2100H, AI Enviroscience, Mitsubishi Chemical Analytech Co., Ltd. |
| Operating temperature                 | 1050 °C                                                              |
| Ar carrier gas flow                   | 150 mL/min                                                           |
| Ar flow of water supply               | 100 mL/min                                                           |
| O <sub>2</sub> flow                   | 300 mL/min                                                           |
| Absorption solution/internal standard | 3.0 mM NH <sub>3</sub> solution + 2.2 mg/L MeSO <sub>3</sub> H       |
| Starting Absorption volume            | 8.5 ml (TF)                                                          |
| Final Absorption volume               | 16 (TF)                                                              |
| Sample amount                         | 5-10 mg (TF)                                                         |
| Water supply level                    | 4 (TF)                                                               |

**Table S 6:** Ion chromatography parameters.

| <b>Ion chromatography component</b> |                                         |
|-------------------------------------|-----------------------------------------|
| IC-device                           | ICS Integrion, Thermo Fisher Scientific |
| Detector                            | conductivity detector                   |
| Guard column                        | AG20 2x50mm guard column                |
| Analytical column                   | Dionex IonPac AS20 2x250mm              |
| Eluent                              | gradient KOH                            |
| Flow rate                           | 0.25 mL/min                             |
| Run time                            | 22 min                                  |
| Column temperature                  | 30 °C                                   |
| Injection volume                    | 5 $\mu\text{l}$ (TF)                    |
| Suppressor regenerant               | 50 mM H <sub>2</sub> SO <sub>4</sub>    |

**Table S 7:** TF boat program.

| Pos | Time (s) | Pos | Time (s) | End Time (s) | Cool Time (s) | Home Time (s) | Ar Time (s) | O <sub>2</sub> Time (s) |
|-----|----------|-----|----------|--------------|---------------|---------------|-------------|-------------------------|
| 100 | 90       | 210 | 60       | 300          | 60            | 200           | 0           | 600                     |

**Table S 8:** IC eluent gradient program.

| Time (min) | Eluent concentration (mM) |
|------------|---------------------------|
| 0          | Start, 1.0                |
| 0.1        | 1.0                       |
| 0.2        | 2.0                       |
| 1.0        | 2.0                       |
| 10.0       | 5.0                       |
| 10.5       | 5.0                       |
| 11.0       | 80.0                      |
| 14.0       | 80.0                      |
| 14.5       | 1.0                       |
| 22.0       | stop run                  |

## S3 Supporting figures

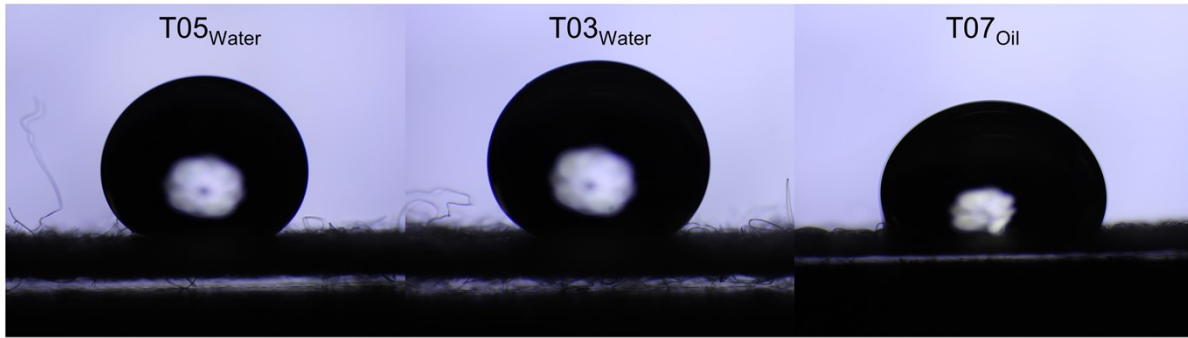

**Figure S 1:** Examples of photos taken of water and sunflower oil droplets on textile surfaces to determine the contact angle.

### Extraction recovery test

An extraction recovery test was performed to verify that the applied extraction technique quantitatively extracts PFAAs from the textiles. Two 4 cm<sup>2</sup> textile pieces and a control without textile (T07, T10) were spiked with a methanolic mixture of PFHpA, PFOA, and PFOS (50 ng each) and left until the MeOH was evaporated. Afterwards, those textiles were extracted by our used extraction procedure (Figure S2) and measured by HPLC-QTOF-MS. The recoveries ranged from 88% up to 102%.

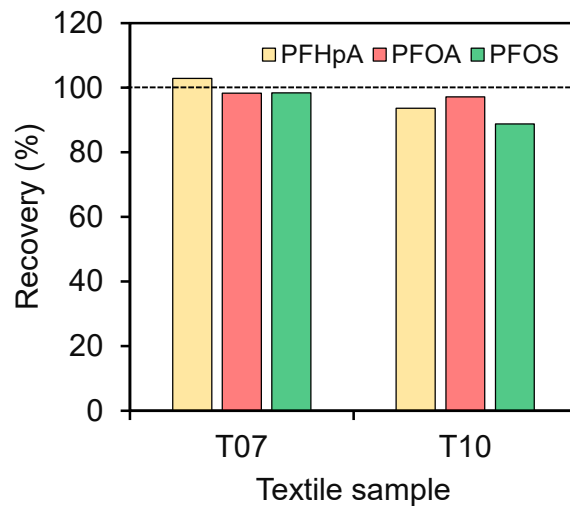

**Figure S 2:** Extraction recoveries for PFHpA, PFOA, and PFOS from spike experiments with two textiles.

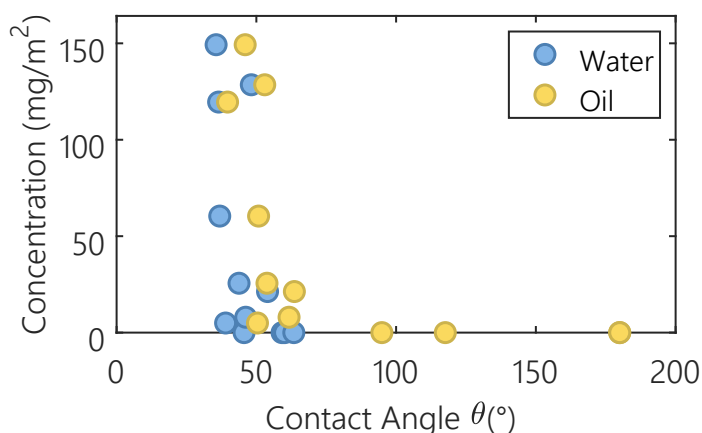

**Figure S 3:** Concentration of  $\Sigma$ PFCAs after 5 h PhotoTOP oxidation in different textiles vs. water and sunflower oil contact angles. Three textiles were completely oil wetting and no PFCAs formed after PhotoTOP oxidation. Water repellency was observed for all textiles.

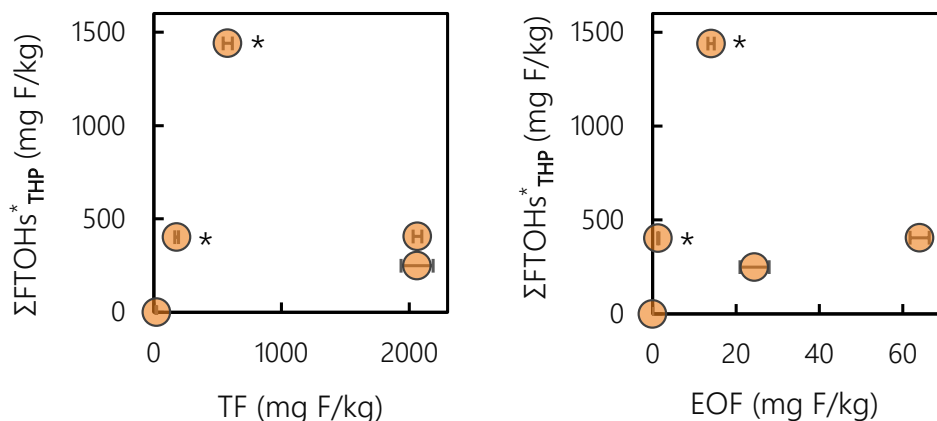

**Figure S 4:** Correlation of partially semi-quantified  $\Sigma$ FTOHs after the THP assay vs. TF and EOF. Data points marked with asterisks include estimated concentrations of n:2 FTOHs with  $n \geq 10$ . Here, probably an overestimation occurred because more fluorine from hydrolysis than from TF measurements is unlikely.

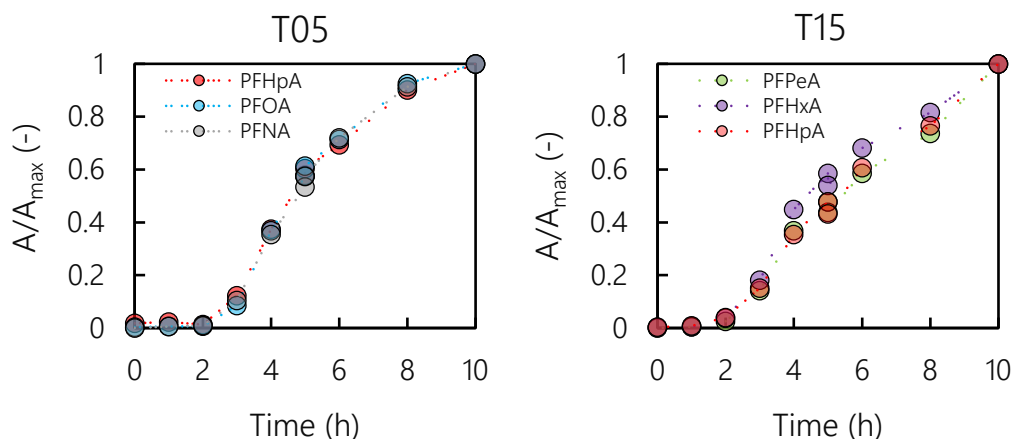

**Figure S 5:** Normalized peak areas of main PFCAs formed from PhotoTOP oxidation of textile T05 and T15 over a time of 10 h. Note that although the concentrations still increased after 5 h the formation rates decreased. The data in Table 1 represents concentrations after 5 h of oxidation. Data was acquired by HPLC-QTOF-MS.

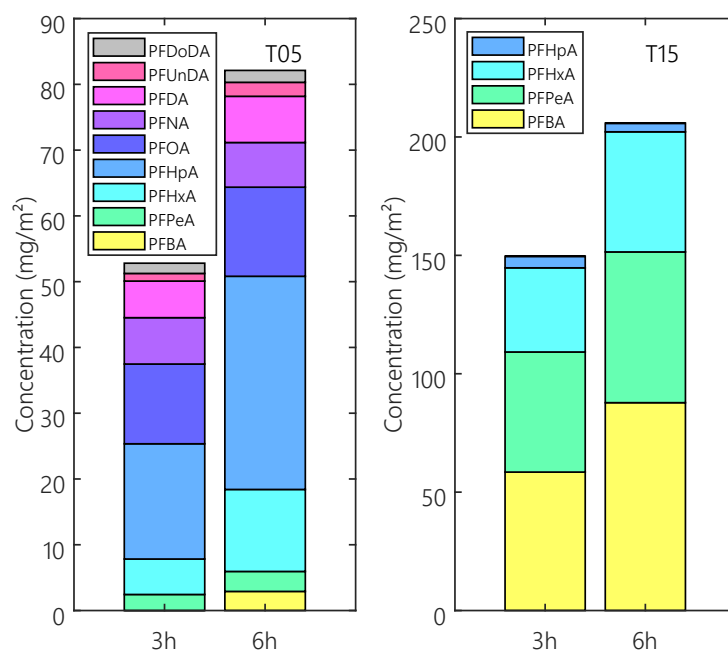

**Figure S 6:** Concentration of PFCAs after 3 and 6 h of dTOP oxidation in textile T05 and T15 respectively.

## References

1. J. Zweigle, B. Bugsel, C. Capitain and C. Zwiener, PhotoTOP: PFAS Precursor Characterization by UV/TiO(2) Photocatalysis, *Environ Sci Technol*, 2022, **56**, 15728-15736.
2. J. Zweigle, B. Bugsel and C. Zwiener, FindPFAS: Non-Target Screening for PFAS - Comprehensive Data Mining for MS2 Fragment Mass Differences, *Anal Chem*, 2022, **94**, 10788-10796.
